# Supplementary material for: CO 2 fluxes and ecosystem dynamics at five European treeless peatlands – merging data and process oriented modeling
Source: Copernicus journal article supplement (doi:10.5194/bg-12-125-2015), 2015-01-09
Supplement: Supplementary file 1 [file bg-12-125-2015-supplement.pdf]

Supplement of Biogeosciences, 12, 125–146, 2015  
<http://www.biogeosciences.net/12/125/2015/>  
doi:10.5194/bg-12-125-2015-supplement  
© Author(s) 2015. CC Attribution 3.0 License.

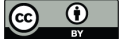

*Supplement of*

## **CO<sub>2</sub> fluxes and ecosystem dynamics at five European treeless peatlands – merging data and process oriented modeling**

**C. Metzger et al.**

*Correspondence to:* C. Metzger (cmetzger@kth.se)

## 1 **Supplemental material**

### 2 ***Calibration procedure***

3 A stepwise approach was used to calibrate model parameter: (I) Parameter ranges of 45  
4 parameters were constrained by applying a Monte Carlo based calibration by multiple runs  
5 with randomized parameter values in a defined range, similar to the Generalized Likelihood  
6 Uncertainty Estimation by Beven and Binley (1992) and Beven (2006). Ranges were selected  
7 according to experiences from previous model runs, in most cases a certain range around the  
8 default values. The list of parameters and their tested ranges are displayed in Table S3. The  
9 output of these runs was compared with several different variables derived from  
10 measurements. A number of performance indicators were considered to define the behavioural  
11 models with an acceptable fit in step I a. Parameter ensembles of accepted behavioural models  
12 were further analysed to identify covariance between parameters and also to understand the  
13 importance and effect of multiple criteria (I b).

14 350'000 runs were executed for each site, except for Hor, for which 700'000 runs were  
15 performed. The higher amount of runs at Hor was motivated by the observed discrepancy in  
16 chamber versus EC derived  $R_{eco}$  values and a wider range for some parameters due to the  
17 relatively high ratio of biomass to GPP.

18 (I a) From these runs, around 75 behavioural models per site were selected according to an  
19 acceptable fit (Tab. S7) to measurement derived  $R_{eco}$  and GPP respectively in case of Hor net  
20 ecosystem exchange (NEE) and plant biomass. Due to their relatively small amplitude, winter  
21 fluxes hardly affect performance indices of the whole year. However they have a high  
22 proportion of soil to plant respiration and are therefore of special interest. Hence, performance  
23 in modelling  $R_{eco}$  and GPP during winter, respectively late autumn in case of Lom (see Tab. 4)  
24 were additionally taken into account. As the ability to constrain parameter values and the  
25 model performance depend on quality and frequency of the available measurement data,  
26 different criteria (Tab. S7) had to be applied for each site.

27 (I b) Performance ( $R^2$ , ME and NSE) of the 75 accepted runs on each variable was plotted  
28 against values for each parameter as well as values for each parameter against values for each  
29 other parameter. These plots were visually analysed to detect covariance between parameters

1 which were further analysed in step III and between parameters and performance which were  
2 further analysed in step I c.

3 (I c) The best fit for one variable does not necessarily lead to the best fit for another variable.  
4 Therefore, a further constraint was achieved by selecting each best 10 out of the 75 runs  
5 independently for each of the variables and each parameter as listed in Table S9. According  
6 the results from I b, different performance indices were used depending on the variable:  $R^2$   
7 was chosen in case of  $R_{\text{eco}}$  and GPP as effect on ME can be compensated by radiation use  
8 efficiency ( $\epsilon_L$ ) in case of GPP and decomposition rate for the fast SOC pools ( $k_I$ ) in case of  
9  $R_{\text{eco}}$ . Mean error was chosen in case of temperature, NSE for all other variables, including  
10 winter  $R_{\text{eco}}$  and winter GPP. This procedure leads to several ranges for each parameter  
11 producing the best performance depending on the variable and the site.

12 (I d) The ranges were merged together to a new range for each parameter, starting with the  
13 highest value of the lower ends of all ranges and lasts to the lowest of the upper ends. These  
14 ranges will be called “overlapping ranges” in the following, even though they did not overlap  
15 in some few cases.

16 (II) Parameters might interact with one or more other parameters and counteract or even  
17 compensate the effect of other parameters. Ranges for such parameters could be same or  
18 overlapping between the sites, but the application of a single set of parameter values might  
19 reveal that only site specific values for one or several of these parameters lead to acceptable  
20 performance. To test this, for each site one of the 75 runs with the highest performance in  $R^2$   
21 of  $R_{\text{eco}}$  selected and  $\epsilon_L$  and  $k_I$  adjusted until ME in GPP and  $R_{\text{eco}}$  was smaller than  $|0.1| \text{ g C m}^{-2}$   
22  $\text{day}^{-1}$ . Afterwards, stepwise each parameter was set to the rounded mean value of the  
23 overlapping range from I d and again  $\epsilon_L$  and  $k_I$  adjusted until ME in GPP and  $R_{\text{eco}}$  was smaller  
24 than  $|0.1| \text{ g C m}^{-2} \text{ day}^{-1}$ . If then the performance in  $R^2$  of  $R_{\text{eco}}$  and GPP was not reduced by  
25 more than 0.05 the modified parameter was kept at this value. Otherwise it was set back to the  
26 previous value and further investigated in III. This procedure was repeated for all parameters  
27 except  $\epsilon_L$  and  $k_I$ .

28 (III) Parameters showing strong interactions or showing different valid ranges for the different  
29 sites or variables were investigated by further multiple calibrations with 2500 to 5000 runs.  
30 For each parameter only this particular parameter and very few other parameters which are  
31 directly related to it were calibrated, while all others were kept constant to the values from  
32 step II. Criteria for accepted runs were a mean error of max  $|0.3| \text{ g C m}^{-2} \text{ day}^{-1}$  in  $R_{\text{eco}}$  and

1 GPP, respectively in GPP and uppermost temperature case of  $p_{ck}$ , to accept 60 to 150 runs.  
2 Such additional multiple calibrations were also performed if the previous results indicated an  
3 optimal range outside the tested range. In this case the calibration range of the parameter was  
4 increased.

5 Then steps I c, d and II were repeated for these additional calibration. If the performance in  $R^2$   
6 of  $R_{eco}$  and GPP was reduced by more than 0.05 the parameter was considered to be site  
7 specific. Again,  $\epsilon_L$  and  $k_l$  were adjusted until ME in GPP and  $R_{eco}$  was smaller than  $|0.1| \text{ g C}$   
8  $\text{m}^{-2} \text{ day}^{-1}$ . This set of parameter values will be called common configuration (C1) in the  
9 following.

10 (IV) Different combination of parameter values might lead to similar good results, which is  
11 called equifinality (Beven, 2006). In those cases were step I to III indicated covariance  
12 between parameters, several different combinations of parameter values leading to similar  
13 good results (ME in GPP and  $R_{eco}$  smaller than  $|0.1| \text{ g C m}^{-2} \text{ day}^{-1}$ ) were tested. Such runs  
14 with a single set of parameter values are called single runs in the following and numbered  
15 with C1 to C7 (Tab. S8).

16

17

18

19 Beven, K.: A manifesto for the equifinality thesis, *Journal of Hydrology*, 320, 18–36,  
20 doi:10.1016/j.jhydrol.2005.07.007, 2006.

21 Beven, K. and Binley, A.: The future of distributed models: Model calibration and uncertainty  
22 prediction, *Hydrological processes*, 6, 279–298, 1992.

23

24

25

26

# 1 **Tables**

## 2 Table S1. Dynamic forcing data

| Site        | Variable                                                                                  | Period          | Resolution of measurement / as used for calibration | number of replicates |
|-------------|-------------------------------------------------------------------------------------------|-----------------|-----------------------------------------------------|----------------------|
| Lom         | water table                                                                               | mid 2006-2010   | half-hourly/hourly                                  | 1                    |
|             | meteorology (temperature, global radiation, precipitation, wind speed, relative humidity) | mid 2006-2010   | half-hourly/hourly                                  | 1                    |
| Amo         | water table                                                                               | April 2007-2010 | half-hourly/hourly                                  | 1                    |
|             | meteorology (temperature, global radiation, precipitation, wind speed, relative humidity) | mid 2006-2010   | half-hourly/hourly                                  | 1                    |
| Hor         | water table                                                                               | 2004-2006       | half-hourly/hourly                                  | 2                    |
|             | meteorology (temperature, global radiation, precipitation, wind speed, relative humidity) | 2004-2011       | half-hourly/hourly                                  | 1                    |
| FsA and FsB | water table                                                                               | 2007-2011       | biweekly, since April 2010 half hourly / hourly     | 1                    |
|             | meteorology (temperature, global radiation, precipitation, wind speed, relative humidity) | 2007-2011       | half-hourly/hourly                                  | 1                    |

3  
4  
5

1 Table S2. Dynamic data for calibrations and comparisons – methods and instruments

| Site | Variable                   | Period                | Resolution of measurement / as used for calibration | Method                                                       | replicate s | Described in                                 | number of data points |
|------|----------------------------|-----------------------|-----------------------------------------------------|--------------------------------------------------------------|-------------|----------------------------------------------|-----------------------|
| Lom  | NEE                        | mid 2006-10           | half-hourly/hourly                                  | EC                                                           | 1           | Aurela et al., 2009)                         | 34895                 |
|      | R <sub>eco</sub>           | 2007, 2009, 2010      | half-hourly/hourly, summer only                     | automatic opaque chamber                                     | 2           | Lohila et al., 2010                          | 27853                 |
|      | R <sub>eco</sub> , GPP     | mid 2006-10           | half-hourly/hourly                                  | empirical modelling from EC data                             | 1           | Aurela et al., 2009                          | 15236                 |
|      | winter R <sub>eco</sub>    | 2006-2010             | half-hourly/hourly                                  | empirical modelling from night NEE EC data during Sept.-Nov. | 1           |                                              | 6356                  |
|      | soil temperature at -7 cm  | mid 2006-10           | half-hourly/hourly                                  | automatic temperature sensors                                | 1           |                                              | 34318                 |
|      | soil temperature at -60 cm | mid 2006-10           | half-hourly/hourly                                  | automatic temperature sensors                                | 1           |                                              | 34318                 |
|      | LAI                        | 2007-10               | 4-10 times each summer                              | optical canopy analyser                                      | 9-19        |                                              | 41                    |
|      | Snow depth                 | mid 2006-10           | hourly                                              | automatic sensor                                             | 1           |                                              | 34316                 |
| Amo  | NEE                        | mid 2006-10           | half-hourly/hourly                                  | EC                                                           | 1           | Drewer et al., 2010                          | 38710                 |
|      | R <sub>eco</sub>           | mid 2006-10           | biweekly                                            | manual opaque chamber                                        | 9           | Dinsmore et al., 2010                        | 57                    |
|      | R <sub>eco</sub> , GPP     | mid 2006-10           | half-hourly/hourly                                  | empirical model from EC data                                 | 1           | Drewer et al., 2010                          | 43475                 |
|      | winter R <sub>eco</sub>    | mid 2006-10           | half-hourly/hourly                                  | empirical modelling from night NEE EC data during Nov. -Apr. | 1           |                                              | 5348                  |
|      | soil temperature at -10 cm | mid 2006-10           | half-hourly/hourly                                  | automatic temperature sensors                                | 1           |                                              | 35808                 |
|      | soil temperature at -40 cm | mid 2006-10           | half-hourly/hourly                                  | automatic temperature sensors                                | 1           |                                              | 35808                 |
|      | LAI                        | 2004                  | 11 times                                            | optical canopy analyser                                      | 2           |                                              | 11                    |
| Hor  | NEE                        | 2004-10, except 2007  | half-hourly/hourly                                  | EC                                                           | 1           | Hendriks et al., 2007                        | 49611                 |
|      | R <sub>eco</sub>           | 2003-06               | biweekly                                            | manual opaque chamber                                        | 6           |                                              | 53                    |
|      | R <sub>eco</sub> , GPP     | 2004-10, except 07,09 | half-hourly/hourly                                  | empirical model from EC data                                 | 1           | Reichstein et al., 2005, Papale et al., 2006 | 39420                 |

|                   |                                      |                                   |                                                  |                                                                                                                                            |   |                                                                        |       |
|-------------------|--------------------------------------|-----------------------------------|--------------------------------------------------|--------------------------------------------------------------------------------------------------------------------------------------------|---|------------------------------------------------------------------------|-------|
|                   | winter<br>R <sub>eco</sub>           | 2004-10,<br>except 07,09          | half-<br>hourly/hourly                           | empirical modelling<br>from night NEE EC data<br>during Nov. -Apr.                                                                         | 1 |                                                                        | 3966  |
|                   | soil<br>temperat<br>ure at -8<br>cm  | mid 2004-<br>mid 2011             | half-<br>hourly/hourly                           | automatic temperature<br>sensors                                                                                                           | 1 |                                                                        | 48881 |
|                   | soil<br>temperat<br>ure at<br>-11 cm | mid 2004-<br>mid 2011             | half-<br>hourly/hourly                           | automatic temperature<br>sensors                                                                                                           | 1 |                                                                        | 48881 |
|                   | LAI                                  | 2006-07                           | 4 times a year                                   | optical canopy analyser,<br>weighted mean from 7<br>vegetation types                                                                       | 3 | Hendriks, 2009                                                         | 8     |
|                   | above<br>ground<br>biomass           | 2005-07                           | 4 times a year                                   | 0.16m <sup>2</sup> clipped, dead<br>leaves removed,<br>weighted mean from 7<br>vegetation types                                            | 3 | Hendriks, 2009                                                         | 12    |
|                   | Root<br>biomass                      | 2006-07                           | 4 times a year                                   | sieved soil cores of<br>1.15·10 <sup>-4</sup> m <sup>3</sup> , dead roots<br>manually removed,<br>weighted mean from 7<br>vegetation types | 2 | Hendriks, 2009                                                         | 8     |
| FsA<br>and<br>FsB | NEE                                  | 2007-2011                         | 3-4 weekly<br>several<br>measurements<br>per day | manual transparent<br>chamber                                                                                                              | 3 | Drösler, 2005; Beetz<br>et al., 2013; Leiber-<br>Sauheitl et al., 2013 | 1161  |
|                   | R <sub>eco</sub>                     | 2007-2011                         | 3-4 weekly<br>several<br>measurements<br>per day | manual opaque chamber                                                                                                                      | 3 | Drösler, 2005; Beetz<br>et al., 2013; Leiber-<br>Sauheitl et al., 2013 | 1161  |
|                   | GPP                                  | 2007-2011                         | 3-4 weekly<br>several<br>measurements<br>per day | empirical model from<br>chamber data                                                                                                       | 3 | Drösler, 2005; Beetz<br>et al., 2013; Leiber-<br>Sauheitl et al., 2013 | 1161  |
|                   | winter<br>R <sub>eco</sub>           | 2007-2011                         | 3-4 weekly<br>several<br>measurements<br>per day | manual opaque chamber<br>during Nov.-Apr.                                                                                                  | 3 |                                                                        | 357   |
|                   | soil<br>temperat<br>ure at -2<br>cm  | 2007                              | half-<br>hourly/hourly                           | automatic temperature<br>sensors                                                                                                           | 1 |                                                                        | 36447 |
|                   | soil<br>temperat<br>ure at<br>-50 cm | 2007                              | half-<br>hourly/hourly                           | automatic temperature<br>sensors                                                                                                           | 1 |                                                                        | 36447 |
|                   | LAI                                  | summer<br>2011-<br>summer<br>2012 | ~3 weekly                                        | optical canopy analyser                                                                                                                    | 3 |                                                                        | 26    |
|                   | Above<br>ground<br>biomass           | 2007-2011                         | 4 weekly                                         | 0.04 m <sup>2</sup> , since 2011 0.16<br>m <sup>2</sup> , clipped and sorted<br>into living and dead                                       | 3 |                                                                        | 43    |

1

1 Table S3. List of main equations used in this study

| Equation                                                                                                                                                                                                                                                                                                                                                                                                                                                                                                       | No.  | Definition                                                                                    |
|----------------------------------------------------------------------------------------------------------------------------------------------------------------------------------------------------------------------------------------------------------------------------------------------------------------------------------------------------------------------------------------------------------------------------------------------------------------------------------------------------------------|------|-----------------------------------------------------------------------------------------------|
| <b>Plant biotic processes</b>                                                                                                                                                                                                                                                                                                                                                                                                                                                                                  |      |                                                                                               |
| $C_{Atm \rightarrow a} = \varepsilon_L \cdot \eta \cdot f(T_l) \cdot f(CN_l) \cdot f(E_{ta} / E_{tp}) \cdot R_{s,pl}$                                                                                                                                                                                                                                                                                                                                                                                          | (1)  | Rate of photosynthesis (g C m <sup>-2</sup> day <sup>-1</sup> )                               |
| where $\varepsilon_L$ is the radiation use efficiency and $\eta$ is the conversion factor from biomass to carbon. $R_{s,pl}$ is the global radiation absorbed by canopy and $f(T_l)$ , $f(CN_l)$ , and $f(E_{ta} / E_{tp})$ limitations due to unfavourable temperature, nitrogen, and water conditions.                                                                                                                                                                                                       |      |                                                                                               |
| $f(T_l) = \begin{cases} 0 & T_l < p_{mn} \\ (T_l - p_{mn}) / (p_{o1} - p_{mn}) & p_{mn} \leq T_l \leq p_{o1} \\ 1 & p_{o1} < T_l < p_{o2} \\ 1 - (T_l - p_{o2}) / (p_{mx} - p_{o2}) & p_{o2} \leq T_l \leq p_{mx} \\ 0 & T_l > p_{mx} \end{cases}$                                                                                                                                                                                                                                                             | (2)  | Response function for leaf temperature                                                        |
| where $p_{mn}$ , $p_{o1}$ , $p_{o2}$ and $p_{mx}$ are parameters and $T_l$ the leaf temperature.                                                                                                                                                                                                                                                                                                                                                                                                               |      |                                                                                               |
| $f(CN_l) = p_{fixedN}$                                                                                                                                                                                                                                                                                                                                                                                                                                                                                         | (3)  | Response function for fixed leaf C:N ratio                                                    |
| Where $p_{fixedN}$ is a parameter.                                                                                                                                                                                                                                                                                                                                                                                                                                                                             |      |                                                                                               |
| $f(E_{ta} / E_{tp}) = \frac{E_{ta}}{E_{tp}}$                                                                                                                                                                                                                                                                                                                                                                                                                                                                   | (4)  | Response function for transpiration                                                           |
| where $E_{ta}$ and $E_{tp}$ are actual and potential transpiration.                                                                                                                                                                                                                                                                                                                                                                                                                                            |      |                                                                                               |
| $C_{a \rightarrow Leaf} = l_{cl} \cdot C_a$                                                                                                                                                                                                                                                                                                                                                                                                                                                                    | (5)  | Allocation of new assimilates to the leaves                                                   |
| where $l_{cl}$ , is a parameter and $C_a$ the new assimilated carbon.                                                                                                                                                                                                                                                                                                                                                                                                                                          |      |                                                                                               |
| $C_{a \rightarrow Root} = (1 - l_{cl}) \cdot C_a$                                                                                                                                                                                                                                                                                                                                                                                                                                                              | (6)  | Allocation of new assimilates to the roots                                                    |
| where $l_{cl}$ , is a parameter and $C_a$ the new assimilated carbon.                                                                                                                                                                                                                                                                                                                                                                                                                                          |      |                                                                                               |
| $C_{resleaf} = k_{mresleaf} \cdot f(T) \cdot C_{leaf} + k_{gresp} \cdot C_{a \rightarrow Leaf}$                                                                                                                                                                                                                                                                                                                                                                                                                | (7)  | Plant growth and maintenance respiration from leaves (g C m <sup>-2</sup> day <sup>-1</sup> ) |
| where $k_{mresleaf}$ is the maintenance respiration coefficient for leaves, $k_{gresp}$ is the growth respiration coefficient, and $f(T)$ is the temperature. The equation calculates respiration from stem, roots, and grains by exchanging $k_{mresleaf}$ to $k_{mrespstem}$ , $k_{mresroot}$ , $k_{mresgrain}$ , and using the corresponding storage pools. Respiration from the old carbon pools is estimated with the same maintenance respiration coefficients as for respiration from new carbon pools. |      |                                                                                               |
| $f(T) = t_{Q10}^{(T - t_{Q10bas})/10}$                                                                                                                                                                                                                                                                                                                                                                                                                                                                         | (8)  | Temperature response function for maintenance respiration (–)                                 |
| where $t_{Q10}$ and $t_{Q10bas}$ are parameters.                                                                                                                                                                                                                                                                                                                                                                                                                                                               |      |                                                                                               |
| $C_{Leaf \rightarrow Stem} = l_{LS} \cdot C_{Leaf}$                                                                                                                                                                                                                                                                                                                                                                                                                                                            | (9)  | Reallocation of C from leaf pool to stem pool – here used as pool for senescent leaves.       |
| where $l_{LS}$ is a parameter and $C_{Leaf}$ the carbon in the leaf pool.                                                                                                                                                                                                                                                                                                                                                                                                                                      |      |                                                                                               |
| $C_{Leaf \rightarrow LitterSurface} = f(T_{Sum}) \cdot f(A_l) \cdot s_{newleaf} \cdot C_{Leaf}$                                                                                                                                                                                                                                                                                                                                                                                                                | (10) | Leaf C entering the surface litter pool                                                       |
| where $s_{newleaf}$ is a scaling factor. Stem C is calculated analogously with $s_{newstem}$ .                                                                                                                                                                                                                                                                                                                                                                                                                 |      |                                                                                               |



$$f(T_{Sum}) = I_{Lc1} + (I_{Lc2} - I_{Lc1}) \cdot \min\left(1, \frac{\max(0, T_{Sum} - t_{L1})}{\max(1, t_{L2} - t_{L1})}\right) \quad (11)$$

leaf litter fall dependence of temperature sum

where  $t_{L1}$ ,  $t_{L2}$ ,  $I_{Lc1}$  and  $I_{Lc2}$  are parameters and  $T_{Sum}$  is the so called “dorming” temperature sum,  $T_{DormSum} - T_{DormSum}$  is calculated at the end to the growing season when the air temperature is below the threshold temperature  $T_{DormTh}$ , as the accumulated difference between  $T_{DormTh}$  and  $T_a$ .  $T_{DormTh}$  is a parameter.

The stem litter rate is calculated analogously with the parameters  $t_{S1}$ ,  $t_{S2}$ ,  $I_{Sc1}$  and  $I_{Sc2}$ .

$$f(A_l) = e^{I_{LaiEnh} \cdot A_l} \quad (12)$$

Litter fall dependency of LAI

where  $I_{LaiEnh}$  is a parameter and  $A_l$  the leaf area index

$$C_{Root \rightarrow Litter} = f(I_{Rc}) \cdot C_{Root} \cdot s_{newroot} \quad (13)$$

Root C entering the soil litter pool of the corresponding layer

where  $s_{newroot}$  is a scaling factor. The root litter rate function,  $f(I_{Rc})$ , can be calculated with Eq. (11) by exchanging the parameters  $t_{L1}$ ,  $t_{L2}$ ,  $I_{Lc1}$  and  $I_{Lc2}$  to  $t_{R1}$ ,  $t_{R2}$ ,  $I_{Rc1}$  and  $I_{Rc2}$ .

$$C_{OldLeaf \rightarrow LitterSurface} = f(I_{Lc}) \cdot (C_{OldLeaf} - C_{RemainLeaf}) s_{oldleaf} \quad (14)$$

Litter fall from roots, leaves and stems in the “old” biomass in perennial plants are calculated similarly to the “new” biomass but with the important exception that some of the old leaves may be retained

where  $s_{oldleaf}$  is a scaling factor. The litter fall for stems and roots is calculated analogously.

$$C_{RemainLeaf} = C_{OldLeaf} \left(1 - \frac{1}{I_{life} - 1}\right) \quad (15)$$

fraction of the whole  $C_{OldLeaf}$  pool that will be excluded from the calculation of the litterfall from the old leaves

where  $I_{life}$  is a parameter

$$C_{Leaf \rightarrow Harvest} = f_{leafharvest} \cdot C_{Leaf} \quad (16)$$

amount of harvested carbon, removed from the system

where  $f_{leafharvest}$  is a parameter. Harvest from the stem pool is calculated analogously by exchanging  $f_{leafharvest}$  with  $f_{stemharvest}$ . These parameters are also used to calculate the harvest fractions from the old stem and leaves perennials.

$$C_{Leaf \rightarrow LitterSurface} = f_{leaflittharv} \cdot (C_{Leaf} - C_{Leaf \rightarrow Harvest}) \quad (17)$$

amount of plant parts, which are removed from the plant and enter the surface litter pool at harvest

where  $f_{leaflittharv}$  is a parameter. Similar flows are calculated for stem and roots by exchanging  $f_{leaflittharv}$  to  $f_{stemlittharv}$

$$C_{Mobile} = (C_{Leaf \rightarrow LitterSurface} + C_{OldLeaf \rightarrow LitterSurface}) \cdot m_{retain} \quad (18)$$

Allocation to the mobile C pool for developing new leaves during litter fall

where  $m_{retain}$  is an allocation coefficient.

$$C_{Mobile \rightarrow Leaf} = C_{Mobile} \cdot m_{shoot} \quad (19)$$

Allocation from the mobile C pool at leafing (between GSI 1 and 2) as an additional supply. This process goes on as long as there is carbon left in the mobile pool.

where  $m_{shoot}$  is an allocation coefficient and  $C_{Mobile}$  the carbon in the mobile pool.

$$C_{Roots \rightarrow Leaf} = m_{Root} \cdot (C_{Roots} - C_{Leaf} \cdot r_{rl}) \quad (20)$$

Allocation of C in the roots to leaves, taking place after a harvest event as long as root:leaf ratio is smaller than the value of the parameter  $r_{rl}$  or until the plant goes to dormancy.

where  $m_{Root}$  and  $r_{rl}$  are parameters and  $C_{Roots}$  and  $C_{Leaf}$  the carbon in the root and leaf pool

## Plant abiotic processes

$$R_{s,pl} = (1 - e^{-k_{rn} \frac{A_l}{f_{cc}}}) \cdot f_{cc} (1 - a_{pl}) R_{is} \quad (21)$$

Plant interception of global radiation  
(MJ m<sup>-2</sup> day<sup>-1</sup>)

where  $k_{rn}$  is the light use extinction coefficient given as a single parameter common for all plants,  $f_{cc}$  is the surface canopy cover,  $a_{pl}$  is the plant albedo and  $R_{is}$ , is the global radiation

$$f_{cc} = p_{cmax} (1 - e^{-p_{ck} A_l}) \quad (22) \quad \text{Surface canopy cover (m}^2 \text{ m}^{-2}\text{)}$$

Where  $p_{cmax}$  is a parameter that determines the maximum surface cover and  $p_{ck}$  is a parameter that governs the speed at which the maximum surface cover is reached.  $A_l$  is the leaf area index of the plant.

$$A_l = \frac{B_l}{p_{l,sp}} \quad (23) \quad \text{Leaf area index (m}^2 \text{ m}^{-2}\text{)}$$

Where  $p_{l,sp}$  is a parameter and  $B_l$  is the total mass of leaf.

$$L_v E_{tp} = \frac{\Delta R_n + \rho_a c_p \frac{(e_s - e_a)}{r_a}}{\Delta + \gamma \left(1 + \frac{r_s}{r_a}\right)} \quad (24) \quad \text{Potential transpiration } E_{tp} \text{ (mm day}^{-1}\text{)}$$

where  $R_n$  is net radiation available for transpiration,  $e_s$  is the vapour pressure at saturation,  $e_a$  is the actual vapour pressure,  $\rho_a$  is air density,  $c_p$  is the specific heat of air at constant pressure,  $L_v$  is the latent heat of vaporisation,  $\Delta$  is the slope of saturated vapour pressure versus temperature curve,  $\gamma$  is the psychrometer 'constant',  $r_s$  is 'effective' surface resistance and  $r_a$  is the aerodynamic resistance.

$$r_s = \frac{1}{\max(A_l g_l, 0.001)} \quad (25) \quad \text{Stomatal resistance (s m}^{-1}\text{)}$$

where  $g_l$  is the leaf conductance.

$$g_l = \frac{R_{is}}{R_{is} + g_{ris}} \frac{g_{max}}{1 + \frac{(e_s - e_a)}{g_{vpd}}} \quad (26) \quad \text{Stomatal conductance per leaf area (m s}^{-1}\text{)}$$

where  $g_{ris}$ ,  $g_{max}$  and  $g_{vpd}$  are parameter values,  $g_{maxwin}$  corresponds to  $g_{vpd}$  in winter.  $R_{is}$ , is the global radiation and  $(e_s - e_a)$  the vapour pressure deficit.

---

### Soil carbon and nitrogen processes

---

$$C_{DecompL} = k_l \cdot f(T) \cdot f(\theta) \cdot C_{Litter} \quad (27) \quad \text{Decomposition of the fast C pools (g C m}^{-2} \text{ day}^{-1}\text{)}$$

Where  $k_l$  is a parameter and  $f(T)$  and  $f(\theta)$  are response functions for soil temperature and moisture in the certain layer.

$$C_{DecompH} = k_h \cdot f(T) \cdot f(\theta) \cdot C_{Humus} \quad (28) \quad \text{Decomposition of the slow C pools (g C m}^{-2} \text{ day}^{-1}\text{)}$$

Where  $k_h$  is a parameter and  $f(T)$  and  $f(\theta)$  are response functions for soil temperature and moisture in the certain layer.

$$f(T) = t_{Q10}^{(T-t_{Q10bas})/10} \quad (29) \quad \text{Response function for soil temperature (-)}$$

Where  $t_{Q10}$  and  $t_{Q10bas}$  are parameters and  $T$  the soil temperature in the certain layer.

$$f(\theta) = \min \begin{cases} p_{\theta s_{act}} & \theta = \theta_s \\ \left( \frac{\theta_s - \theta}{p_{\theta U_{pp}}} \right)^{p_{\theta p}} (1 - p_{\theta s_{act}}) + p_{\theta s_{act}} & \theta_{wilt} \leq \theta \leq \theta_s \\ \left( \frac{\theta - \theta_{wilt}}{p_{\theta L_{ow}}} \right)^{p_{\theta p}} & \theta < \theta_{wilt} \\ 0 & \theta < \theta_{wilt} \end{cases} \quad (30) \quad \text{Response function for soil moisture (-)}$$

where  $p_{\theta U_{pp}}$ ,  $p_{\theta L_{ow}}$ ,  $p_{\theta s_{act}}$ , and  $p_{\theta p}$  are parameters and the variables,  $\theta_s$ ,  $\theta_{wilt}$ , and  $\theta$ , are the soil moisture content at saturation, the soil moisture content at the wilting point, and the actual soil moisture content, respectively.

$$C_{LitterSurface \rightarrow Litter1} = l_{l1} \cdot C_{LitterSurface} \quad (31) \quad \text{Litter from inactive surface litter pool, entering the fast SOC pool at a continuous rate.}$$

where  $l_{l1}$  is a parameter and  $C_{LitterSurface}$  the carbon in the surface litter pool.

$$C_{Litter \rightarrow CO_2} = (1 - f_{e,l}) \cdot C_{Decompl} \quad (32) \quad \text{Amount of decomposition products from the fast SOC pools being released as } CO_2$$

where  $f_{e,l}$  is a parameter

$$C_{Litter \rightarrow Humus} = f_{e,l} \cdot f_{h,l} \cdot C_{Decompl} \quad (33) \quad \text{Amount of decomposition products from the fast SOC pools entering the slow decomposition pools}$$

where  $f_{e,l}$  and  $f_{h,l}$  are parameters

$$C_{Litter \rightarrow Litter} = f_{e,l} (1 - f_{h,l}) \cdot C_{Decompl} \quad (34) \quad \text{Amount of decomposition products from the fast SOC pools being returned to the fast decomposition pools}$$

where  $f_{e,l}$  and  $f_{h,l}$  are parameters

$$C_{Humus \rightarrow CO_2} = f_{e,h} \cdot C_{Decompl} \quad (35) \quad \text{Amount of decomposition products from the slow SOC pools being released as } CO_2$$

where  $f_{e,h}$  is a parameter

---

#### Soil heat processes

---

$$q_h = -k_h \frac{\partial T}{\partial z} \quad (36) \quad \text{Soil heat flux (J m}^{-2} \text{ day}^{-1}\text{)}$$

where  $k_h$  is the conductivity,  $T$  is the soil temperature and  $z$  is depth.

$$q_h(0) = k_{ho} \frac{(T_s - T_1)}{\Delta z / 2} + C_w (T_s) q_{in} + L_v q_{vo} \quad (37) \quad \text{Upper boundary condition for soil heat flow (J m}^{-2} \text{ day}^{-1}\text{)}$$

where  $k_{ho}$  is the conductivity of the organic material at the surface,  $T_s$  is the surface temperature,  $T_1$  is the temperature in the uppermost soil layer,  $q_{in}$  is the water infiltration rate,  $q_{vo}$  is the water vapour flow, and  $L_v$  is the latent heat.

$$k_{ho} = h_1 + h_2 \theta \quad (38) \quad \text{Heat conductivity of the organic material at the surface}$$

where  $h_1$  and  $h_2$  are empirical constants

$$T_{ss} = \frac{T_1 + a T_a}{1 + a} \quad (39) \quad \text{Soil surface temperature under the snow pack, during periods with snow cover (} ^\circ\text{C)}$$

where the index 1 means the top soil layer, and the snow surface temperature is assumed to be equal to air temperature.  $a$  is a weighting factor depending on snow thickness and conductivity in the snow pack and in the uppermost soil layer.

$$T_{LowB} = T_{amean} - T_{amp} e^{-\frac{z}{d_a}} \cos \left( (t - t_{ph}) \omega - \frac{z}{d_a} \right) \quad (40) \quad \text{Temperature at the lower boundary for heat conduction (} ^\circ\text{C)}$$


---

where  $T_{amean}$  and  $T_{aamp}$  are parameters,  $t$  is the time,  $t_{ph}$  is the phase shift,  $\omega$  is the frequency of the cycle and  $d_a$  is the damping depth.

---

Soil water processes

---

$$q_w = -k_w \left( \frac{\partial \psi}{\partial z} - 1 \right) - D_v \frac{\partial c_v}{\partial z} \quad (41)$$

The total water flow,  $q_w$ , is the sum of the matrix flow,  $q_{mat}$  and the vapour flow,  $q_v$ , ( $\text{mm day}^{-1}$ )

where  $k_w$  is the unsaturated hydraulic conductivity,  $\psi$  is the water tension,  $z$  is depth,  $c_v$  is the concentration of vapour in soil air and  $D_v$  is the diffusion coefficient for vapour in the soil

$$\frac{\partial \theta}{\partial t} = -\frac{\partial q_w}{\partial z} + s_w \quad (42)$$

The general equation for unsaturated water flow follows from the law of mass conservation and eq. (41)

where  $\theta$  is the soil water content and  $s_w$  is a source/sink term for e.g. horizontal in and outflow or root water uptake.

$$S_e = \left( \frac{\psi}{\psi_a} \right)^{-\lambda} \quad (43)$$

Water tension  $\psi$  according to Brooks & Corey (1964), between the threshold values  $\psi_x$  and  $\psi_{mat}$ .

where  $\psi_a$  is the air-entry tension,  $\lambda$  is the pore size distribution index and  $S_e$  the effective saturation.

$$S_e = \frac{\theta - \theta_r}{\theta_s - \theta_r} \quad (44)$$

Effective saturation  $S_e$ , between the threshold values  $\psi_x$  and  $\psi_{mat}$ .

where  $\theta_s$  is the porosity,  $\theta_r$  is porosity content and  $\theta$  is the actual water content.

$$\frac{\log \left( \frac{\psi}{\psi_x} \right)}{\log \left( \frac{\psi_{wilt}}{\psi_x} \right)} = \frac{\theta_x - \theta}{\theta_x - \theta_{wilt}} \quad \text{for } \psi_x < \psi < \psi_{wilt} \quad (45)$$

The relation between water content and tension above the threshold  $\psi_x$

where  $\theta_x$  is the threshold water content at the threshold tension,  $\psi_x$ ,  $\theta_{wilt}$  is the water content at wilting point, defined as a tension of 15 000 cm water, i.e.  $\psi_{wilt}$ .

$$\psi = \psi_{mat} - \frac{(\theta - \theta_s + \theta_m)}{\theta_m} \psi_{mat} \quad \text{for } \psi_s < \psi < \psi_{mat} \quad (46)$$

In the range close to saturation, i.e. from  $\theta_s$  to  $\theta_m$  a linear expression is used for the relationship between water content,  $\theta$ , and water tension,  $\psi$

where  $\psi_{mat}$  is the tension that corresponds to a water content of  $\theta_s - \theta_m$ .

$$k_w^* = k_{mat} S_e^{\left( n+2+\frac{2}{\lambda} \right)} \quad (47)$$

Unsaturated hydraulic conductivity  $k_w^*$  ( $\text{mm day}^{-1}$ )

where  $k_{mat}$  is a parameter corresponding to the saturated matrix conductivity and  $n$  is a parameter accounting for pore correlation and flow path tortuosity.

$$k_w = 10^{\left( \log(k_w^*(\theta_s - \theta_m)) + \frac{\theta + \theta_s + \theta_m}{\theta_m} \log \left( \frac{k_{sat}}{k_w(\theta_s - \theta_m)} \right) \right)} \quad (48)$$

Total conductivity close to saturation (above the threshold  $\psi_x$ ), to account for the conductivity in the macro pores.

where  $k_{sat}$  is the saturated total conductivity, which includes the macro pores, and  $k_w^*(\theta_s - \theta_m)$  is the hydraulic conductivity below  $\theta_s - \theta_m$  (i.e. at  $\psi_{mat}$ ) calculated from eq (47)

$$k_w = (r_{AOT} + r_{AIT} T_s) \max(k_w^*, k_{minuc}) \quad (49)$$

Actual unsaturated hydraulic conductivity after temperature corrections

---

where  $r_{AOT}$ ,  $r_{AIT}$  and  $k_{minuc}$  are parameter values.  $k_w^*$  is the conductivity according to eqs (47) and (48)

---

1

1 Table S4. Calibrated parameters

| Symbol          | Name                | unit       | Eq.  | Definition                                                                                                                   | Min                                      | Max                                                         |
|-----------------|---------------------|------------|------|------------------------------------------------------------------------------------------------------------------------------|------------------------------------------|-------------------------------------------------------------|
| $g_{maxwin}$    | CondMaxWinter       | $m s^{-1}$ | (26) | maximal conductance of fully open stomata to calculate the potential transpiration of plants during winter                   | 0.002                                    | 1                                                           |
| $g_{ph}$        | GSI Post Harvest(1) | -          |      | growth stage to which the plant is set back after harvest                                                                    | 1.3                                      | 3                                                           |
| $k_{gresp}$     | GrowthCoef(1)       | $day^{-1}$ | (7)  | rate coefficient for growth respiration of the plant (respiration relative to amount of assimilates)                         | 0.13                                     | 0.25                                                        |
| $k_l$           | RateCoefLitter1     | $a^{-1}$   | (27) | rate coefficient for the decay of SOC in the fast pools                                                                      |                                          | 0.003                                                       |
| $k_{mrespleaf}$ | MCoefLeaf(1)        | $day^{-1}$ | (7)  | rate coefficient for maintenance respiration of leaves (respiration relative to leaf biomass)                                | 0.015                                    | 0.035                                                       |
| $k_{mresproot}$ | MCoefRoot(1)        | $day^{-1}$ | (7)  | maintenance respiration coefficient for root (respiration relative to root biomass)                                          |                                          | 0.003                                                       |
| $k_{mrespstem}$ | MCoefStem(1)        | $day^{-1}$ | (7)  | maintenance respiration coefficient for stem (respiration relative to stem biomass)                                          |                                          | 0.013                                                       |
| $k_{rn}$        | RntLAI              | -          | (21) | extinction coefficient in the Beer's law used to calculate the partitioning of net radiation between canopy and soil surface | 0.52                                     | 1                                                           |
| $l_{cl}$        | Leaf c1(1)          | $g C^{-1}$ | (5)  | fraction of new assimilates which is allocated to the leaves                                                                 | 0.52                                     | 0.55                                                        |
| $l_{ll}$        | RateCoefSurf L1     | $day^{-1}$ | (31) | fraction of the above ground residues that enter the litter 1 pool of the uppermost soil layer                               | 0.002                                    | 0.008                                                       |
| $l_{LaiEnh}$    | LAI Enh Coef(1)     | -          | (12) | scaling factor for enhanced leaf litter fall rates when higher LAI values are reached                                        | 0.0016                                   | 0.6                                                         |
| $l_{Lc1}$       | LeafRate1(1)        | $day^{-1}$ | (11) | rate coefficient for the leaf litter fall before the first threshold temperature sum $t_{L1}$ is reached                     |                                          | 0.05                                                        |
| $l_{Lc2}$       | LeafRate2(1)        | $day^{-1}$ | (11) | rate coefficient for the leaf litter fall after the second threshold temperature sum $t_{L2}$ is reached                     | 0.1                                      | 0.3                                                         |
| $l_{LS}$        | C Leaf to Stem(1)   | -          | (9)  | scaling factor for reallocation of C from leaf to stem after the plant reached maturity growth state                         | 0.015                                    | 0.025                                                       |
| $l_{Rc1}$       | RootRate1(1)        | $day^{-1}$ | (13) | rate coefficient for the litter fall from roots before the first threshold temperature sum $t_{R1}$ is reached               |                                          | 0.015                                                       |
| $l_{Rc2}$       | RootRate2(1)        | $day^{-1}$ | (13) | rate coefficient for the litter fall from roots after the second threshold temperature sum $t_{R2}$ is reached               | 0.01                                     | 0.05                                                        |
| $l_{Sc1}$       | StemRate1(1)        | $day^{-1}$ | (11) | rate coefficient for the litter fall from stems before the first threshold temperature sum $t_{S1}$ is reached               | 0.003                                    | 0.1                                                         |
| $l_{Sc2}$       | StemRate2(1)        | $day^{-1}$ | (11) | rate coefficient for the litter fall from stems after the second threshold temperature sum $t_{S2}$ is reached               | 0.03                                     | 0.2                                                         |
| $m_{retain}$    | Mobile Allo Coef    | -          | (18) | coefficient for determining allocation to mobile internal storage pool                                                       | 0.4 <sup>a</sup> ,<br>0.05 <sup>bc</sup> | 0.8 <sup>ab</sup> , 0.5 <sup>c</sup> ,<br>0.45 <sup>d</sup> |

|                     |                     |                        |              |                                                                                                                                                                                         |                                                                                    |                                                                                  |
|---------------------|---------------------|------------------------|--------------|-----------------------------------------------------------------------------------------------------------------------------------------------------------------------------------------|------------------------------------------------------------------------------------|----------------------------------------------------------------------------------|
|                     |                     |                        |              |                                                                                                                                                                                         | 0.01 <sup>d</sup>                                                                  |                                                                                  |
| $m_{Root}$          | RateCoef_fRoot(1)   | -                      | (20)         | speed at which reallocation of C from roots to leaves after harvest take place                                                                                                          | 0.005                                                                              | 0.04                                                                             |
| $m_{shoot}$         | Shoot Coef          | -                      | (19)         | coefficient for the rate at which C is reallocated from the mobile pool to the leaf at leafing                                                                                          | 0.05                                                                               | 0.15                                                                             |
| $p_{ck}$            | Area kExp(1)        | -                      | (22)         | speed at which the maximum surface cover of the plant canopy is reached                                                                                                                 | 0.5                                                                                | 1                                                                                |
| $p_{Lsp}$           | Specific LeafArea   | g C<br>m <sup>-2</sup> | (23)         | factor for calculating LAI from leaf biomass, which is actually the inverse of specific leaf area, i.e. leaf mass per unit leaf                                                         | 44                                                                                 | 49                                                                               |
| $p_{mn}$            | T LMin(1)           | °C                     | (2)          | minimum mean air temperature at which photosynthesis can take place                                                                                                                     | 0.001                                                                              | 0.5                                                                              |
| $p_{op}$            | ThetaPowerCoef      | vol %                  | (30)         | power coefficient in the response function of microbial activity in dependency of soil moisture                                                                                         | 0.65                                                                               | 4.5                                                                              |
| $p_{\theta Satact}$ | Saturation activity | vol %                  | (30)         | parameter in the soil moisture response function defining the microbial activity under saturated conditions                                                                             | 0.001                                                                              | 0.252, 1 <sup>f</sup>                                                            |
| $p_{\theta Upp}$    | ThetaUpperRange     | vol %                  | (30)         | water content interval in the soil moisture response function for microbial activity                                                                                                    | 20, 8 <sup>f</sup>                                                                 | 77                                                                               |
| $r_{rl}$            | Root Leaf Ratio(1)  | -                      | (20)         | threshold value for the root:leaf ratio at which reallocation of C from roots to leaves takes place after an harvest event                                                              | 5                                                                                  | 6.5                                                                              |
| $s_{newleaf}$       | New Leaf(1)         | -                      | (10)         | scaling factor for litter fall from new leaves                                                                                                                                          | 0.15                                                                               | 0.25                                                                             |
| $s_{newroot}$       | New Roots(1)        | -                      | (13)         | scaling factor for litter fall from new roots                                                                                                                                           | 0.1                                                                                | 0.25                                                                             |
| $s_{newstem}$       | New Stem(1)         | -                      | (10)         | scaling factor for litter fall from new stems                                                                                                                                           | 0.1                                                                                | 0.15                                                                             |
| $T_{amean}$         | TempAirMean         | °C                     | (40)         | assumed value of mean air temperature for the lower boundary condition for heat conduction.                                                                                             | 5.5 <sup>a</sup> ,<br>10.5 <sup>b,d</sup> ,<br>13 <sup>c</sup>                     | 6.2 <sup>a</sup> ,<br>15.5 <sup>b,c</sup> , 13 <sup>d</sup>                      |
| $T_{DormTh}$        | Dormancy Tth        | °C                     | (11)         | threshold temperature for plant dormancy – if the temperature falls below this value for five consecutive days, the dormancy temperature sum starts to be calculated.                   | 0.1                                                                                | 2.5, 5 <sup>f</sup>                                                              |
| $T_{EmergeSum}$     | TempSumStart        | °C                     |              | air temperature sum which is the threshold for start of plant development                                                                                                               | 0.5                                                                                | 10                                                                               |
| $T_{EmergeTh}$      | TempSumCrit         | °C                     |              | critical air temperature that must be exceeded for temperature sum calculation                                                                                                          | 0.15                                                                               | 1                                                                                |
| $t_{L1}$            | LeafTsum1(1)        | day°C                  | (11)         | threshold temperature sum after reaching dormancy state for the lower leaf litter rate. When it is reached, $l_{Lc1}$ starts to change towards the increased litter fall rate $l_{Lc2}$ | 10                                                                                 | 20                                                                               |
| $t_{L2}$            | LeafTsum2(1)        | day°C                  | (11)         | threshold temperature sum after reaching dormancy state for the higher leaf litter rate. When it is reached, the full high litter rate is applied.                                      | 20                                                                                 | 50                                                                               |
| $T_{MatureSum}$     | Mature Tsum         | °C                     |              | temperature sum beginning from grain filling stage for plant reaching maturity stage                                                                                                    | 80 <sup>a</sup> ,<br>320 <sup>b</sup> ,<br>750 <sup>c</sup> ,<br>1050 <sup>d</sup> | 115 <sup>a</sup> , 450 <sup>b</sup> ,<br>850 <sup>c</sup> ,<br>1350 <sup>d</sup> |
| $t_{Q10}$           | TemQ10              | -                      | (8),<br>(29) | response to a 10 °C soil temperature change on the microbial activity, mineralisation-immobilisation, nitrification and denitrification and plant maintenance                           | 1.95                                                                               | 3.5                                                                              |

|                 |                  |                       |              | respiration                                                                                                                                                                             |                                                                                    |                                       |
|-----------------|------------------|-----------------------|--------------|-----------------------------------------------------------------------------------------------------------------------------------------------------------------------------------------|------------------------------------------------------------------------------------|---------------------------------------|
| $t_{Q10bas}$    | TemQ10Bas        | °C                    | (8),<br>(29) | base temperature for the microbial activity, mineralisation-immobilisation, nitrification and denitrification at which the response is 1                                                | 15                                                                                 | 26                                    |
| $t_{R1}$        | RootTsum1(1)     | day°C                 | (13)         | threshold temperature sum after reaching dormancy state for the lower root litter rate. When it is reached, $t_{Rc1}$ starts to change towards the increased litter fall rate $t_{Rc2}$ | 10                                                                                 | 20                                    |
| $t_{R2}$        | RootTsum2(1)     | day°C                 | (13)         | threshold temperature sum after reaching dormancy state for the higher root litter rate. When it is reached, the full high litter rate is applied.                                      | 20                                                                                 | 50                                    |
| $t_{S1}$        | StemTsum1(1)     | day°C                 | (11)         | threshold temperature sum after reaching dormancy state for the lower stem litter rate. When it is reached, $t_{Sc1}$ starts to change towards the increased litter fall rate $t_{Sc2}$ | 10                                                                                 | 20                                    |
| $t_{S2}$        | StemTsum2(1)     | day°C                 | (11)         | threshold temperature sum after reaching dormancy state for the higher stem litter rate. When it is reached, the full high litter rate is applied.                                      | 20                                                                                 | 50                                    |
| $\varepsilon_L$ | PhoRadEfficiency | $\frac{gDw}{MJ^{-1}}$ | (1)          | radiation use efficiency for photosynthesis under optimum temperature, moisture and nutrients conditions                                                                                | 1.5 <sup>a</sup> ,<br>2.3 <sup>b</sup> ,<br>1.8 <sup>c</sup> ,<br>2.5 <sup>d</sup> | 2.6 <sup>ab</sup> , 3.2 <sup>cd</sup> |

- 
- 1 <sup>a</sup> at Lom
  - 2 <sup>b</sup> at Amo
  - 3 <sup>c</sup> at Hor
  - 4 <sup>d</sup> at FsA and FsB
  - 5 <sup>e</sup> Parameter uses opposite values to the linked parameter
  - 6 <sup>f</sup> range tested in additional multiple runs
  - 7
  - 8



1 Table S5. Most important parameters with constant values

| Symbol            | Name                | unit                                | Eq.                    | Definition                                                                                                                                              | Value                    |
|-------------------|---------------------|-------------------------------------|------------------------|---------------------------------------------------------------------------------------------------------------------------------------------------------|--------------------------|
| $Z_{humus}$       | OrganicLayerThick   | m                                   |                        | thickness of the humus layer as used as a thermal property                                                                                              | $3^{abd}$ ; $2.5^c$      |
| $a_{pl}$          | AlbedoLeaf          | %                                   | (21)                   | plant albedo                                                                                                                                            | 25                       |
| $f_{e,h}$         | Eff Humus           | day <sup>-1</sup>                   | (35)                   | fraction of decomposition products from the slow SOC pools being released as CO <sub>2</sub>                                                            | 0.5                      |
| $f_{e,l}$         | Eff Litter1         | day <sup>-1</sup>                   | (32),<br>(33),<br>(34) | fraction of decomposition products from the fast SOC pools being released as CO <sub>2</sub>                                                            | 0.5                      |
| $f_{h,l}$         | HumFracLitter1      | day <sup>-1</sup>                   | (32),<br>(34)          | fraction of decomposition products from the fast SOC pools that will enter the slow decomposition pools                                                 | 0.2                      |
| $f_{leafharvest}$ | FHarvest Leaf       | -                                   | (16)                   | the fraction of leaves that is harvested                                                                                                                | 0.85                     |
| $f_{leaflitharv}$ | FLitter Leaf        | -                                   | (17)                   | fraction of the remaining leaves after harvest that enters the fast SOC pool                                                                            | 0.1                      |
| $f_{stemharvest}$ | FHarvest Stem       | -                                   | (16)                   | the fraction of stem that is harvested                                                                                                                  | 0.85                     |
| $f_{stemlitharv}$ | FLitter Stem        | -                                   | (17)                   | fraction of the remaining stem after harvest that enters the fast C pool                                                                                | 0.1                      |
| $g_{max}$         | CondMax             | m <sup>2</sup> s <sup>-1</sup>      | (26)                   | the maximal conductance of fully open stomata                                                                                                           | 0.02                     |
| $g_{ris}$         | CondRis             | J m <sup>-2</sup> day <sup>-1</sup> | (26)                   | the global radiation intensity that represents half-light saturation in the light response                                                              |                          |
| $g_{vpd}$         | CondVPD             | Pa                                  | (26)                   | the vapour pressure deficit that corresponds to a 50 % reduction of stomata conductance                                                                 | 100                      |
| $h_1$             | OrganicC1           | -                                   | (38)                   | empirical constant in the heat conductivity of the organic material at the surface                                                                      | 0.06                     |
| $h_2$             | OrganicC2           | -                                   | (38)                   | empirical constant in the heat conductivity of the organic material at the surface                                                                      | 0.005                    |
| $k_h$             | RateCoefHumus       | day <sup>-1</sup>                   | (28)                   | rate coefficient for the decay of C in the slow SOC pools                                                                                               | $2 \cdot 10^{-8}$        |
| $k_{mat}$         | Matrix Conductivity | mm day <sup>-1</sup>                | (47)                   | matrix conductivity in the function for unsaturated conductivity                                                                                        | $1200^I$ ,<br>$300^{II}$ |
| $k_{sat}$         | Total Conductivity  | mm day <sup>-1</sup>                | (48)                   | total conductivity under saturated conditions                                                                                                           | $1200^I$ ,<br>$300^{II}$ |
| $l_{life}$        | Max Leaf Lifetime   | a                                   | (15)                   | maximum leaf lifetime                                                                                                                                   | 1                        |
| $n$               | n Tortuosity        | -                                   | (47)                   | parameter for pore correlation and flow path tortuosity in the function for unsaturated hydraulic conductivity                                          | 1                        |
| $p_{cmax}$        | Max Cover           | m <sup>2</sup> m <sup>-2</sup>      | (22)                   | maximum surface cover of plant                                                                                                                          | 1                        |
| $p_{fixedN}$      | FixedN              | -                                   | (3)                    | response for leaf C:N ratio                                                                                                                             | 1                        |
| $p_{mx}$          | PhoTempResMax       | °C                                  | (2)                    | maximum mean air temperature for photosynthesis                                                                                                         | 35                       |
| $p_{o1}$          | PhoTempResOpt1      | °C                                  | (2)                    | lower limit mean air temperature for optimum photosynthesis                                                                                             | 15                       |
| $p_{o2}$          | PhoTempResOpt2      | °C                                  | (2)                    | upper limit mean air temperature for optimum photosynthesis                                                                                             | 25                       |
| $p_{\theta Low}$  | ThetaLowerRange     | vol %                               | (30)                   | water content interval in the soil moisture response function for microbial activity, mineralisation-immobilisation, nitrification and denitrification. | 13                       |
| $r_{AIT}$         | TempFacLinIncrease  | °C <sup>-1</sup>                    | (49)                   | The slope coefficient in a linear temperature dependence function for the hydraulic conductivity                                                        | 0.023                    |

|                |                   |                             |                        |                                                                                                                  |                                                                                                                                 |
|----------------|-------------------|-----------------------------|------------------------|------------------------------------------------------------------------------------------------------------------|---------------------------------------------------------------------------------------------------------------------------------|
| $r_{AOT}$      | TempFacAtZero     | -                           | (49)                   | relative hydraulic conductivity at 0°C compared with a reference temperature of 20°C.                            | 0.54                                                                                                                            |
| $S_{oldleaf}$  | Old Leaf(1)       | -                           | (14)                   | scaling factor for litter fall of old leaf                                                                       | 1                                                                                                                               |
| $S_{oldroot}$  | Old Roots(1)      | -                           | (14)                   | scaling factor for litter fall of old roots                                                                      | 1                                                                                                                               |
| $S_{oldstem}$  | Old Stem(1)       | -                           | (14)                   | scaling factor for litter fall of old stem                                                                       | 1                                                                                                                               |
| $T_{aamp}$     | TempAirAmpl       | °C                          | (40)                   | assumed value of the amplitude of the sine curve , representing the lower boundary condition for heat conduction | 10                                                                                                                              |
| $z$            | LowerDepth        | m                           |                        | depth of the border between the upper and lower horizon in respect to hydrological properties                    | 0.3                                                                                                                             |
| $\eta$         | Biomass to carbon | mol C<br>g <sup>-1</sup> dw | (1)                    | conversion factor from biomass to carbon                                                                         | 0.45                                                                                                                            |
| $\theta_m$     | Macro Pore        | vol %                       | (46),<br>(48)          | macro pore volume                                                                                                | 4 <sup>Iab</sup> , 6.5 <sup>Ic</sup> ,<br>7.38 <sup>IId</sup> ,<br>4 <sup>IIab</sup> , 8 <sup>IIcd</sup>                        |
| $\theta_r$     | Residual Water    | vol %                       | (44)                   | residual soil water content                                                                                      | 0.3 <sup>I</sup> , 0 <sup>II</sup>                                                                                              |
| $\theta_s$     | Saturation        | vol %                       | (44),<br>(46),<br>(48) | water content at saturation                                                                                      | 84 <sup>Iab</sup> , 79 <sup>Ic</sup> ,<br>83 <sup>IId</sup> ,<br>86 <sup>IIab</sup> ,<br>90 <sup>IIc</sup> , 89 <sup>IIId</sup> |
| $\theta_{wil}$ | Wilting Point     | vol %                       | (45)                   | water content at wilting point                                                                                   | 20 <sup>Iab</sup> , 2 <sup>Ic</sup> ,<br>33 <sup>IId</sup> , 22 <sup>II</sup>                                                   |
| $\lambda$      | Lambda            | -                           |                        | pore size distribution index                                                                                     | 0.2 <sup>ab</sup> ,<br>0.07 <sup>IId</sup> ,<br>0.24 <sup>Ic</sup> ,<br>0.09 <sup>IIcd</sup>                                    |
| $\psi_a$       | Air Entry         | cm                          | (43)                   | air-entry tension                                                                                                | 8 <sup>Iab</sup> , 3.8 <sup>Ic</sup> ,<br>12 <sup>IId</sup> ,<br>10 <sup>IIab</sup> ,<br>24 <sup>IIcd</sup>                     |
| $\psi_x$       | Upper Boundary    | cm                          | (45)                   | soil water tension at the upper boundary of Brooks & Corey's expression                                          | 8000                                                                                                                            |

- 1 <sup>a</sup> at Lom
- 2 <sup>b</sup> at Amo
- 3 <sup>c</sup> at Hor
- 4 <sup>d</sup> at FsA and FsB
- 5 <sup>I</sup> upper horizont
- 6 <sup>II</sup> lower horizont
- 7
- 8

1 Table S6. CoupModel switches - differences to default configuration

| Modules                       | Options                     | Value                              |
|-------------------------------|-----------------------------|------------------------------------|
| Abiotic driving variables     | SoilDrainageInput           | Simulated                          |
| Abiotic driving variables     | SoilInfillInput             | Simulated                          |
| Abiotic driving variables     | SoilTempInput               | Simulated                          |
| Abiotic driving variables     | SoilWaterFlowInput          | Simulated                          |
| Abiotic driving variables     | SoilWaterInput              | Simulated                          |
| Abiotic driving variables     | WaterStressInput            | Simulated                          |
| Drainage and deep percolation | DriveDrainLevel             | Driving File                       |
| Drainage and deep percolation | PhysicalDrainEq             | Linear Model                       |
| External N inputs             | N Deposition                | on                                 |
| Gas processes                 | Methane Model               | Detailed                           |
| Gas processes                 | Methane emission by plants  | on                                 |
| Gas processes                 | Methane oxidation by plants | on                                 |
| Gas processes                 | Trace Gas Emissions         | Direct Loss                        |
| Hidden                        | AboveTable                  | No                                 |
| Hidden                        | TAirGlobRad                 | Used                               |
| Hidden                        | TimeResolution              | Hourly                             |
| Hidden                        | TypeOfDrivingFile           | Standard driving file              |
| Interception                  | PrecInterception            | on                                 |
| Meteorological Data           | CloudInput                  | Estimated(sunshine)                |
| Meteorological Data           | HumRelInput                 | Read from PG-file (first position) |
| Meteorological Data           | PrecInput                   | Read from PG-file (first position) |
| Meteorological Data           | TempAirInput                | Read from PG-file (first position) |
| Meteorological Data           | VapourAirInput              | As relative humidity               |
| Model Structure               | Evaporation                 | Radiation input style              |
| Model Structure               | GroundWaterFlow             | on                                 |
| Model Structure               | LateralInput                | WaterShed approach                 |
| Model Structure               | Nitrogen and Carbon         | Dynamic interaction with abiotics  |
| Model Structure               | PlantType                   | Explicit big leafes                |
| Model Structure               | SnowPack                    | on                                 |
| Model Structure               | WaterEq                     | On with complete soil profile      |
| Numerical                     | NitrogenCarbonStep          | Independent                        |
| Plant                         | AlbedoVeg                   | Simulated                          |
| Plant                         | CanopyHeightInput           | Simulated                          |
| Plant                         | LaiInput                    | Simulated                          |
| Plant                         | PlantDevelopment            | Start=f(TempSum)                   |
| Plant                         | RootInput                   | Simulated                          |
| Plant Growth                  | Growth                      | Radiation use efficiency           |
| Plant Growth                  | Harvest Day                 | PG File specified                  |
| Plant Growth                  | Litter fall dynamics        | f(DormingTempSum)                  |

|                          |                      |                          |
|--------------------------|----------------------|--------------------------|
| Plant Growth             | N ReAllocation       | On                       |
| Plant Growth             | N fixed Supply       | on                       |
| Plant Growth             | PlantRespiration     | Growth and Maintenance   |
| Plant Growth             | ReAllocationToLeaf   | On                       |
| Plant Growth             | Winter regulation    | On                       |
| Soil evaporation         | Evaporation Method   | Iterative Energy Balance |
| Soil evaporation         | Surface Temperature  | f(E-balance Solution)    |
| Soil frost               | FrostSwelling        | Off                      |
| Soil heat flows          | Convection flow      | Not accounted for        |
| Soil mineral N processes | Denitrification      | Microbial based          |
| Soil mineral N processes | Nitrification        | Microbial based          |
| Soil organic processes   | Initial Soil Organic | Table                    |

---

1

2

3

4

1 Table S7. Criteria for accepted runs in the basic calibration (I a). Lower and upper limits are  
 2 separated by fore slash. In case of  $R^2$ , the upper limit corresponds to the highest value  
 3 achieved for this site. The criteria were selected to fit for around 75 runs and depend on the  
 4 different performances achieved for the different sites.

| Site | Accepted runs | $R_{eco} ME$ | $R_{eco} R^2$ | GPP ME     | GPP $R^2$ | LAI ME     | LAI $R^2$ | Winter $R_{eco} ME$ | Winter GPP ME | NEE $R^2$ | Root biomass ME |
|------|---------------|--------------|---------------|------------|-----------|------------|-----------|---------------------|---------------|-----------|-----------------|
| Lom  | 74            | -0.15/0.15   | 0.72/0.79     | -0.15/0.15 | 0.65/0.70 | -0.2/0.2   |           | -0.25/0.25          | -0.25/0.25    |           |                 |
| Amo  | 64            | -0.2/0.2     | 0.65/0.71     | -0.2/0.2   | 0.65/0.68 | -0.5/0.5   |           | -0.4/0.4            | -0.4/0.4      |           |                 |
| Hor  | 74            | -0.5/0.5     |               | -0.5/0.5   |           |            |           | -2/2                |               | 0.48/0.53 | -150/150        |
| FsA  | 68            | -0.85/0.85   | 0.5/0.73      | -0.85/0.85 | 0.32      | -0.3/0.3   | 0.58/0.75 | -3/3                | -1/1          |           |                 |
| FsB  | 67            | -0.8/0.8     | 0.65/0.87     | -0.8/0.8   | 0.35/0.40 | -0.25/0.25 |           | -2/2                | -1/1          |           |                 |

5

1 Table S8. Configurations of the selected single value representations C1-C7. Resulting values  
 2 for  $k_{IJ}$  and  $\varepsilon_L$  can be found in Figure 6.

| Identifier               | Description                                                 | $t_{Q10}$<br>[-] | $t_{Q10bas}$<br>[°C] | $p_{\theta Satact}$<br>[-] | $k_{mrespleaf}$<br>[day <sup>-1</sup> ] | C:N fast<br>pool [-] | $p_{ck}$ [-]                                                                |
|--------------------------|-------------------------------------------------------------|------------------|----------------------|----------------------------|-----------------------------------------|----------------------|-----------------------------------------------------------------------------|
| C1_basic                 | selected basic common configuration                         | 2.7              | 18.5                 | 0.05                       | 0.017                                   | 27.5                 | 0.42 <sup>a</sup> , 0.2 <sup>b</sup> ,<br>0.9 <sup>c</sup> , 1 <sup>d</sup> |
| C2_↑plant_resp           | higher ratio of plant to soil respiration                   | 2.7              | 18.5                 | 0.05                       | 0.022                                   | 27.5                 | 0.42 <sup>a</sup> , 0.2 <sup>b</sup> ,<br>0.9 <sup>c</sup> , 1 <sup>d</sup> |
| C3_↑ $p_{\theta Satact}$ | higher saturation activity                                  | 2.7              | 18.5                 | 0.40                       | 0.017                                   | 27.5                 | 0.42 <sup>a</sup> , 0.2 <sup>b</sup> ,<br>0.9 <sup>c</sup> , 1 <sup>d</sup> |
| C4_↑temp_response        | steeper temperature response function                       | 4.0              | 12.0                 | 0.05                       | 0.008                                   | 27.5                 | 0.42 <sup>a</sup> , 0.2 <sup>b</sup> ,<br>0.9 <sup>c</sup> , 1 <sup>d</sup> |
| C5_C3&C4                 | higher saturation activity and steeper temperature response | 4.0              | 12.0                 | 0.40                       | 0.008                                   | 27.5                 | 0.42 <sup>a</sup> , 0.2 <sup>b</sup> ,<br>0.9 <sup>c</sup> , 1 <sup>d</sup> |
| C6_C:N_60                | C:N of 60 for the fast decomposition pools                  | 2.7              | 18.5                 | 0.05                       | 0.017                                   | 60                   | 0.42 <sup>a</sup> , 0.2 <sup>b</sup> ,<br>0.9 <sup>c</sup> , 1 <sup>d</sup> |
| C7_common_ $p_{ck}$      | same $p_{ck}$ value for all sites                           | 2.7              | 18.5                 | 0.05                       | 0.017                                   | 27.5                 | 1                                                                           |

3 <sup>a</sup> at Lom

4 <sup>b</sup> at Amo

5 <sup>c</sup> at Hor

6 <sup>d</sup> at FsA and FsB

7

1 Table S9. Variables and related parameter as used for further parameter constraint in step I c  
 2 and III

| Variable                    | Site                    | Parameter                                                                                                                                                                                                                                                                                                                                                                                                 |
|-----------------------------|-------------------------|-----------------------------------------------------------------------------------------------------------------------------------------------------------------------------------------------------------------------------------------------------------------------------------------------------------------------------------------------------------------------------------------------------------|
| R <sub>eco</sub>            | Lom, Amo, Hor, FsA, FsB | $l_{cl}, l_{Sc1}, l_{Sc2}, l_{Lc1}, l_{Lc2}, l_{LaiEnh}, T_{MatureSum}, T_{DormTh}, t_{R1}, t_{R2}, t_{S1}, t_{S2}, g_{maxwin}, k_{mrespstem}, k_{mresproots}, p_{\theta Satact}, p_{\theta Upp}, l_{l1}, p_{\theta}, k_l, T_{EmergeSum}, t_{Q10}, t_{Q10bas}$                                                                                                                                            |
| GPP                         | Lom, Amo, Hor, FsA, FsB | $k_{rn}, p_{ck}, \epsilon_L, p_{l,sp}, l_{cl}, S_{newroot}, S_{newleaf}, S_{newstem}, l_{Rc1}, l_{Rc2}, l_{Sc1}, l_{Sc2}, l_{Lc1}, l_{Lc2}, l_{LaiEnh}, T_{MatureSum}, l_{LS}, T_{DormTh}, t_{L1}, t_{L2}, t_{R1}, t_{R2}, t_{S1}, t_{S2}, m_{shoots}, m_{retain}, T_{EmergeTh}, T_{EmergeSum}, p_{mn}, g_{maxwin}, g_{ph}, k_{mrespstem}, k_{mresproots}, k_{gresp}, k_{mrespleaf}, t_{Q10}, t_{Q10bas}$ |
| winter R <sub>eco</sub>     | Lom, Amo, Hor, FsA, FsB | $t_{R1}, t_{R2}, t_{S1}, t_{S2}, k_{gresp}, p_{\theta Satact}, p_{\theta Upp}, l_{l1}, p_{\theta}, k_l, T_{EmergeSum}, t_{Q10}, t_{Q10bas}$                                                                                                                                                                                                                                                               |
| winter GPP                  | Lom, Amo, Hor, FsA, FsB | $l_{cl}, S_{newstem}, l_{Sc2}, l_{Lc1}, T_{MatureSum}, l_{LS}, T_{DormTh}, t_{L1}, t_{L2}, t_{R1}, t_{R2}, t_{S1}, t_{S2}, p_{mn}, g_{maxwin}, g_{ph}, k_{gresp}, k_{mrespleaf}$                                                                                                                                                                                                                          |
| upper most soil temperature | Lom, Amo, Hor, FsA, FsB | $k_{rn}, p_{ck}, \epsilon_L$                                                                                                                                                                                                                                                                                                                                                                              |
| lowest soil temperature     | Lom, Amo, Hor, FsA, FsB | $T_{amean}$                                                                                                                                                                                                                                                                                                                                                                                               |
| LAI                         | Lom, Hor, FsA, FsB      | $k_{rn}, p_{ck}, \epsilon_L, p_{l,sp}, l_{cl}, S_{newleaf}, l_{LaiEnh}, T_{MatureSum}, T_{DormTh}, t_{L1}, t_{L2}, m_{shoots}, m_{retain}, T_{EmergeTh}, T_{EmergeSum}, m_{Roots}, k_{mrespleaf}, r_{rl}, g_{ph}$                                                                                                                                                                                         |
| snow depth                  | Lom                     |                                                                                                                                                                                                                                                                                                                                                                                                           |
| green above ground biomass  | Hor, FsA, FsB           | $\epsilon_L, p_{l,sp}, S_{newroot}, S_{newleaf}, S_{newstem}, g_{ph}$                                                                                                                                                                                                                                                                                                                                     |
| total above ground biomass  | Hor, FsA, FsB           | $S_{newstem}, l_{LS}, g_{ph}, k_{mrespleaf}$                                                                                                                                                                                                                                                                                                                                                              |
| root biomass                | Hor                     | $l_{cl}, S_{newroot}, l_{Rc1}, l_{Rc2}$                                                                                                                                                                                                                                                                                                                                                                   |

3

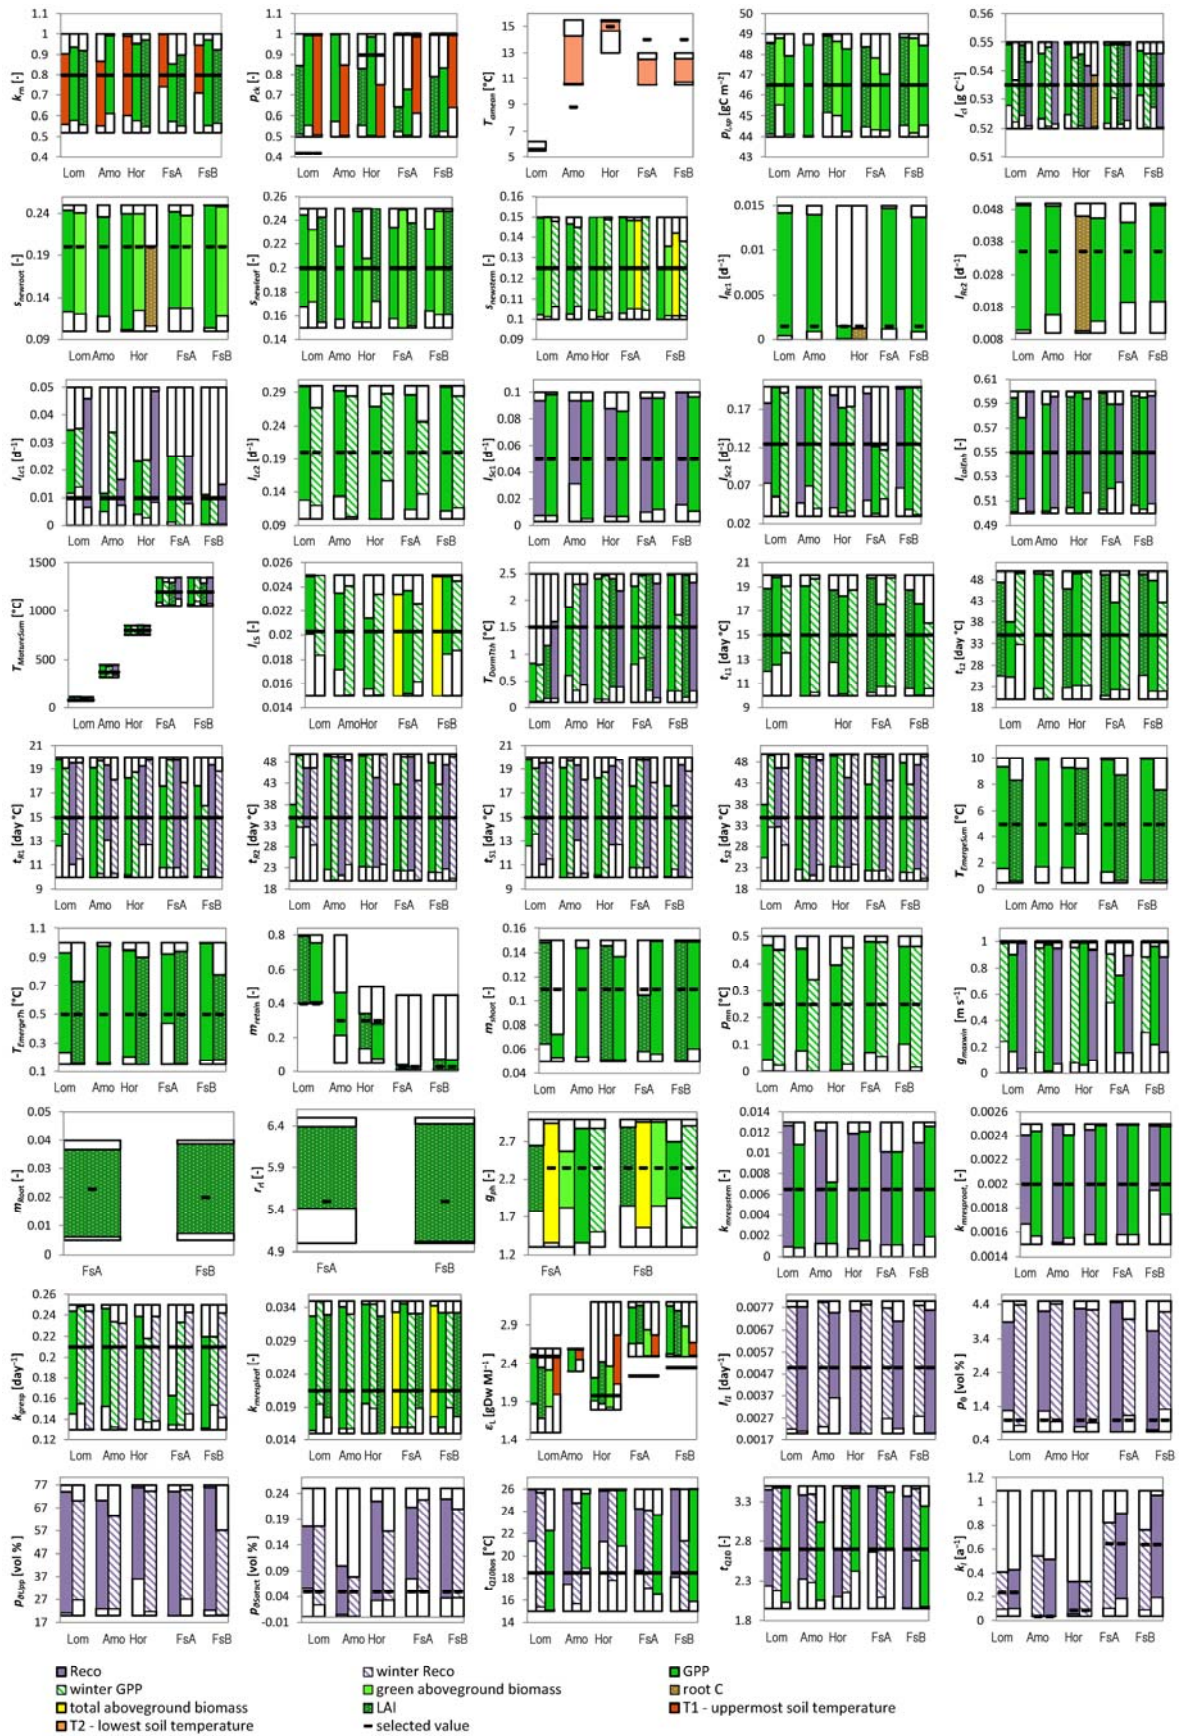

1



1 Figure S1. Tested parameters and ranges of the basic calibration and for configuration C1 selected values. Each  
2 solid bar show the range of the 10 out of 350'000 runs with the best performance index for a validation variable  
3 (x-axis). Only those bars were shown where either a covariance between the performance on this variable and  
4 the parameter were detected or expected due to model equations. Tested ranges are indicated by the grey frame  
5 around the bar.
